# Supplementary material for: Malate transported from chloroplast to mitochondrion triggers production of ROS and PCD in Arabidopsis thaliana
Source: PubMed Central journal article supplement (PMC5939044; doi:10.1038/s41422-018-0024-8), 2018-03-14
Supplement: 41422_2018_24_MOESM5_ESM.pdf [file 41422_2018_24_MOESM5_ESM.pdf]

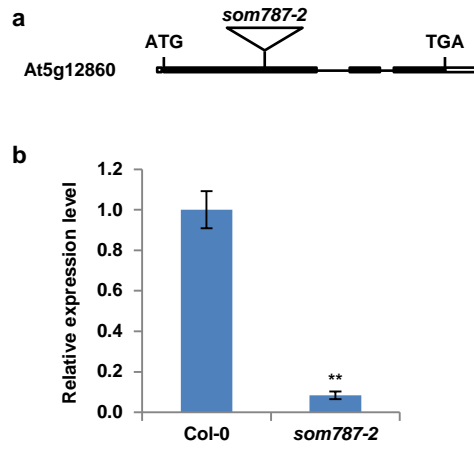

**Supplementary information, Figure S5** Characterization of *som787-2*.

(a) The T-DNA insertion site of *som787-2*.

(b) Transcript levels of *SOM787* in Col-0 and *som787-2*, revealed by qRT-PCR using *Actin* as reference. Values are means  $\pm$  SD ( $n = 3$ ). The asterisks represent significant difference determined by Student's *t* test. \*\* $P < 0.01$ .
