# Supplementary material for: Malate transported from chloroplast to mitochondrion triggers production of ROS and PCD in Arabidopsis thaliana
Source: PubMed Central journal article supplement (PMC5939044; doi:10.1038/s41422-018-0024-8), 2018-03-14
Supplement: 41422_2018_24_MOESM8_ESM.pdf [file 41422_2018_24_MOESM8_ESM.pdf]

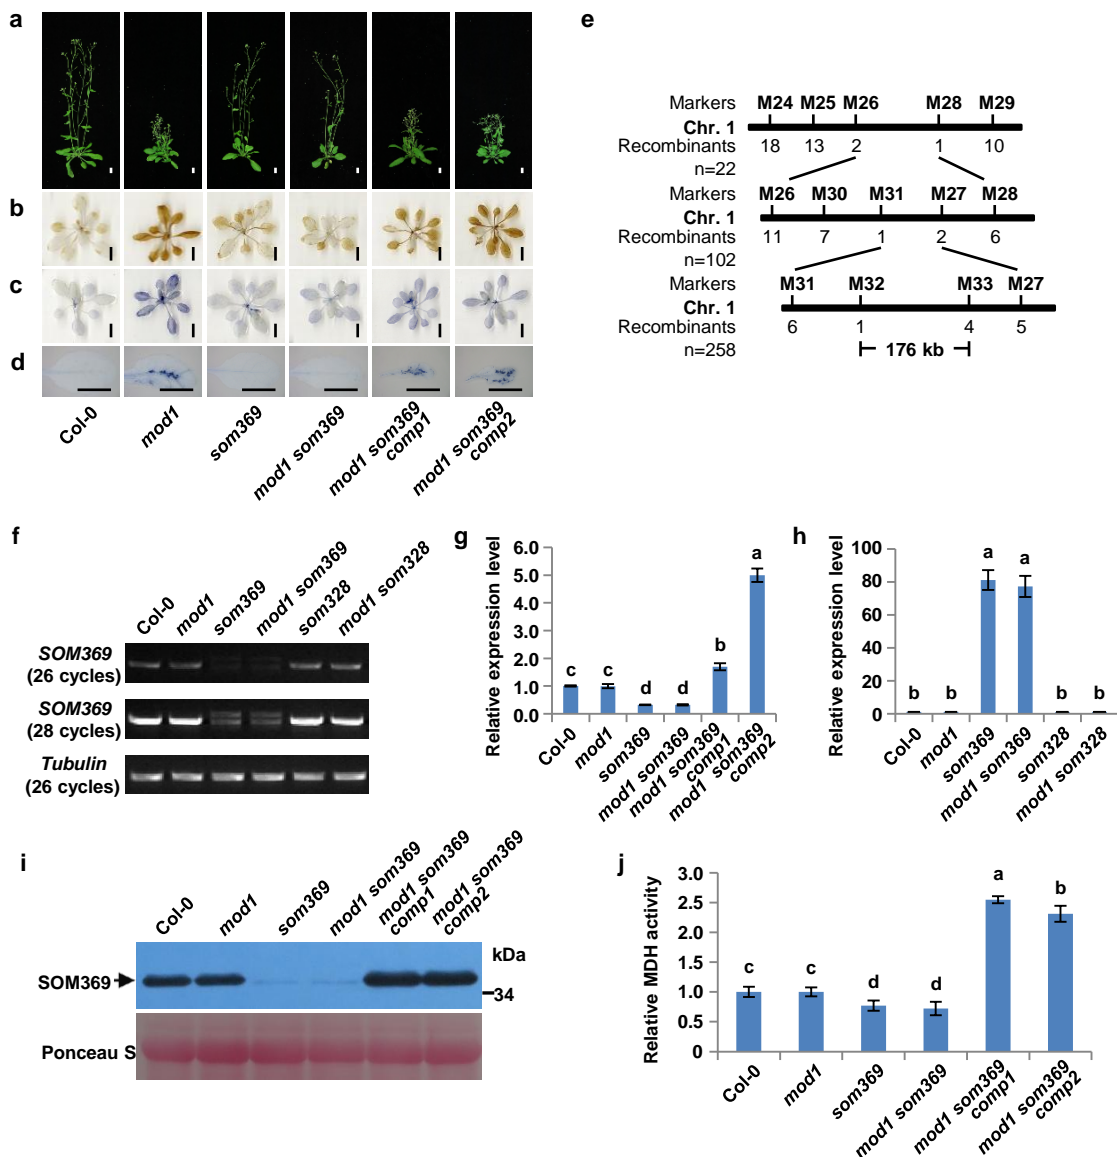

**Supplementary information, Figure S8** Cloning and characterization of *SOM369*.

- (a) Phenotypes of *Col-0*, *mod1*, *som369*, *mod1 som369*, *mod1 som369 comp1* and 2 (*mod1 som369* complemented line 1 and 2) at 35 DAG. Scale bars, 1 cm.
- (b) DAB-stained seedlings. Scale bars, 1 cm.
- (c) NBT-stained seedlings. Scale bars, 1 cm.
- (d) Trypan blue-stained leaves. Scale bars, 1 cm.
- (e) Map-based cloning of *SOM369*.
- (f) Transcript levels of *SOM369* revealed by reverse transcription (RT)-PCR using *Tubulin* as reference.
- (g) Transcript levels of *SOM369* revealed by qRT-PCR using *Actin* as reference. Values are means  $\pm$  SD ( $n = 3$ ), and different letters at top of each column indicate a significant difference at  $P < 0.05$  determined by Tukey's HSD test.
- (h) The expression levels of the transcript containing *SOM369* intron 1 revealed by qRT-PCR using *Actin* as reference. Values are means  $\pm$  SD ( $n = 3$ ), and different letters at top of each column indicate a significant difference at  $P < 0.05$  determined by Tukey's HSD test.
- (i) Protein levels of *SOM369* in indicated plants detected by immunoblotting with anti-*SOM328* polyclonal antibodies.
- (j) Comparison of total cellular MDH activities in indicated plants. Values are means  $\pm$  SD ( $n = 6$ ), and different letters at top of each column indicate a significant difference at  $P < 0.05$  determined by Tukey's HSD test.
